# Supplementary material
Source: HighWire-hosted journal article supplement (https://bmjopen.bmj.com/content/14/4/e074604)
Supplement: inline-supplementary-material-3 [file inline-supplementary-material-3.pdf]

## **Additional file 3 – Additional results**

In this section, we describe in more detail some of the results of the study.

### **ICU-based model (RS<sub>1</sub>)**

The features computed from the data acquired during the patients' ICU stay that were selected for the first model are detailed in Table SM3-1. A total of 45 features were included in the model from the 161 candidate features.

Calibration plots of the model for both development and validation sets are shown in Figure SM3-1. Figure SM3-2 shows the AUROC values achieved by the first model (RS<sub>1</sub>) for predicting the adverse event (combined outcome) within an increasingly high number of days after discharge from ICU. The curves of the AUROC values for each outcome, in-hospital death or ICU re-admission, separately, are also shown.

**Table SM3-1.** Features computed from information acquired during the patients' ICU stay used in the first model, and the corresponding odds ratio and 95% confidence interval (95% CI) for the odds ratio. The normalisation parameters for each feature (mean and standard deviation, SD) are also shown.

**Figure SM3-1.** Calibration curves for the first model (RS<sub>1</sub>) for predicting a future adverse event after ICU discharge. The left-hand panel shows the calibration curve on the development dataset, the right-hand panel shows the calibration curve of the developed model on the validation dataset. The grey line depicts an ideal calibration, representing a perfect correspondence between the observed events and the predicted events for each decile of score.

**Figure SM3-2.** Performance of the first model (as given by the AUROC) for prediction of cumulative in-hospital deaths, cumulative ICU re-admissions, and cumulative adverse events up to a cut-off day after ICU discharge. The left-hand panel shows the results using the development dataset, and the right-hand panel shows the performance using the validation dataset. The bottom graphs show the proportion of each event (N) over time for the three outcomes considered.

### **Vital-sign based model (RS<sub>2</sub>)**

For the second scoring system, we considered the construction of a multivariate, (possibly) multimodal model of normality, based on the vital-sign observation sets recorded during the 24 hours that preceded discharge home or during the last post-ICU day with recorded data (which corresponds to the 14<sup>th</sup> day) if the patient had not

been discharged, died or re-admitted to the ICU. These observation sets contain the vital signs from the most stable period of the patient's stay, because these data were acquired when patients are at their most "normal" state after discharge from ICU. This set of "normal" data contains  $N = 1,082$  5-dimensional vital-sign vectors. Table SM3-2 gives the corresponding means and standard deviations of this subset of data, used to train the model.

**Table SM3-2.** Vital signs' mean and standard deviation (SD) values for observations recorded in during the most "stable" period considered.

Figure SM3-1.

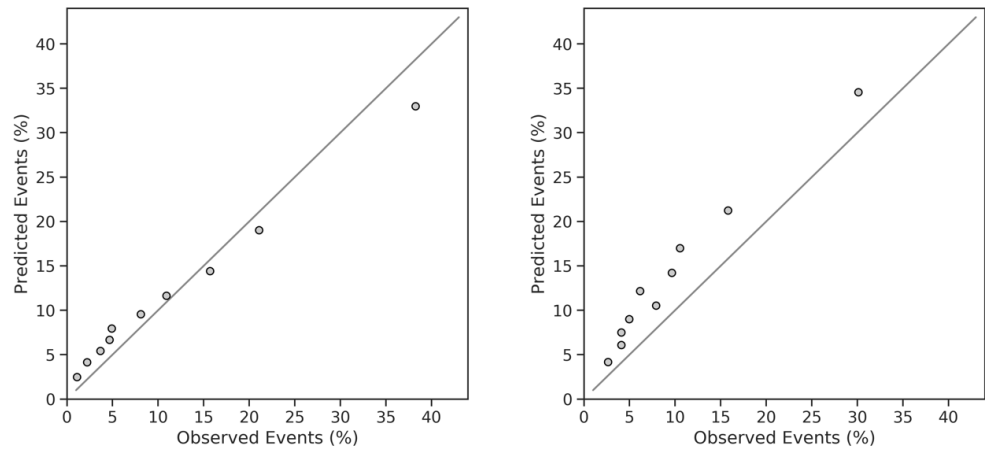

Figure SM3-2.

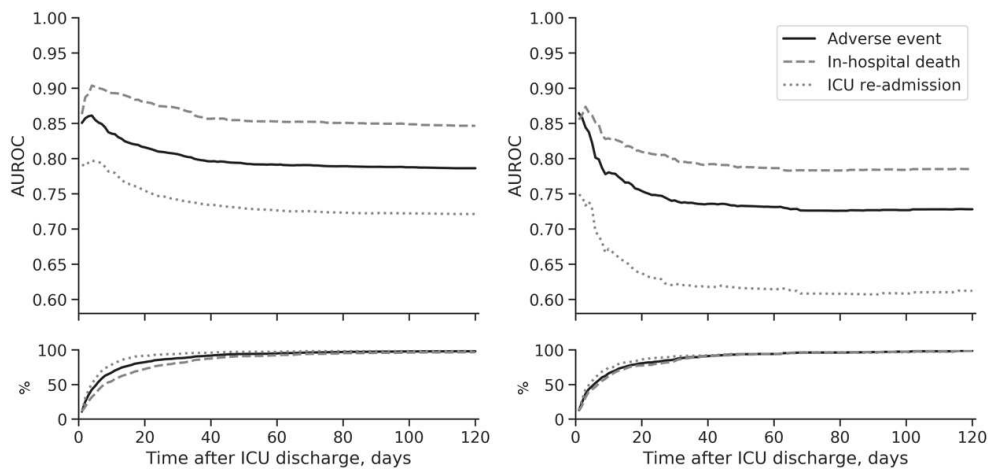

Table SM3-1.

| Feature description                                                          | Mean (SD) |        | Odds ratio | 95% CI         |
|------------------------------------------------------------------------------|-----------|--------|------------|----------------|
| Demographic and administrative information (3 features)                      |           |        |            |                |
| Age at admission to ICU                                                      | 59        | (17)   | 1.305      | 1.196 to 1.425 |
| Time spend in the ICU, in days                                               | 4.3       | (19.5) | 1.134      | 1.072 to 1.199 |
| Time from acute hospital admission and ICU admission, in days                | 4.2       | (7.4)  | 1.038      | 0.964 to 1.119 |
| Vital signs related (13 features)                                            |           |        |            |                |
| Last ventricular heart rate                                                  | 86        | (17)   | 1.135      | 1.024 to 1.259 |
| Highest respiratory rate in the last 72 hours                                | 26        | (7)    | 1.129      | 1.033 to 1.235 |
| Lowest ventricular heart rate in the last 72 hours                           | 70        | (16)   | 1.056      | 0.927 to 1.202 |
| Highest ventricular heart rate in the first 24 hours                         | 105       | (22)   | 1.039      | 0.944 to 1.143 |
| Last respiratory rate                                                        | 18        | (5)    | 1.026      | 0.943 to 1.116 |
| Lowest ventricular heart rate in the first 24 hours                          | 72        | (17)   | 1.023      | 0.901 to 1.161 |
| Highest SpO <sub>2</sub> recorded using pulse oximetry in the last 72 hours  | 100       | (1)    | 1.016      | 0.944 to 1.094 |
| Lowest respiratory rate in the first 24 hours                                | 12        | (3)    | 1.002      | 0.925 to 1.085 |
| Lowest temperature in the first 24 hours                                     | 37.0      | (0.7)  | 0.984      | 0.906 to 1.068 |
| Highest temperature in the first 24 hours                                    | 35.5      | (0.8)  | 0.981      | 0.889 to 1.083 |
| Last mean arterial blood pressure                                            | 91        | (16)   | 0.921      | 0.853 to 0.995 |
| Lowest temperature in the last 72 hours                                      | 35.5      | (0.7)  | 0.917      | 0.831 to 1.011 |
| Last total GCS recorded                                                      | 14        | (1)    | 0.854      | 0.805 to 0.906 |
| Laboratory test results related (24 features)                                |           |        |            |                |
| Last plasma urea                                                             | 9.1       | (7.1)  | 1.313      | 1.186 to 1.453 |
| Last plasma sodium                                                           | 139       | (4)    | 1.152      | 1.073 to 1.237 |
| Highest INR in the first 24 hours                                            | 1.23      | (0.48) | 1.063      | 0.982 to 1.151 |
| Last plasma bilirubin                                                        | 12.8      | (14.8) | 1.052      | 0.984 to 1.124 |
| Highest pH in the first 24 hours                                             | 7.43      | (0.06) | 1.051      | 0.971 to 1.138 |
| Highest C-reactive protein in the first 24 hours                             | 91        | (55)   | 1.050      | 0.939 to 1.173 |
| Last plasma lactate                                                          | 1.16      | (0.71) | 1.028      | 0.957 to 1.103 |
| Last INR                                                                     | 1.13      | (0.35) | 1.027      | 0.951 to 1.111 |
| Last C-reactive protein                                                      | 89        | (54)   | 1.009      | 0.904 to 1.126 |
| Highest platelet count in the first 24 hours                                 | 200       | (109)  | 1.006      | 0.929 to 1.089 |
| Last plasma sodium was in the extremes of the development set range (> or <) | -         | -      | 1.003      | 0.831 to 1.211 |
| Last plasma creatinine                                                       | 116       | (130)  | 0.993      | 0.735 to 1.342 |
| The variability of AaDO <sub>2</sub> in the last 72 hours                    | 6.1       | (5.1)  | 0.990      | 0.908 to 1.080 |
| Highest weight in the first 24 hours                                         | 77        | (20)   | 0.989      | 0.909 to 1.076 |
| Last haematocrit                                                             | 32        | (5)    | 0.989      | 0.881 to 1.110 |
| Highest creatinine in the last 24 hours                                      | 124       | (142)  | 0.975      | 0.744 to 1.278 |

|                                                             |      |        |       |                |
|-------------------------------------------------------------|------|--------|-------|----------------|
| Lowest haemoglobin in the first 24 hours                    | 9.6  | (2.0)  | 0.963 | 0.864 to 1.075 |
| Highest white blood cell count in the first 24 hours        | 13.9 | (7.0)  | 0.962 | 0.893 to 1.036 |
| Lowest plasma potassium in the first 24 hours               | 3.8  | (0.5)  | 0.951 | 0.879 to 1.030 |
| Highest plasma creatinine in the last 72 hours              | 134  | (153)  | 0.950 | 0.752 to 1.200 |
| Total urine output in the first 24 hours                    | 1772 | (1260) | 0.937 | 0.842 to 1.043 |
| Last PaO <sub>2</sub> /FiO <sub>2</sub> ratio               | 43.7 | (15.8) | 0.904 | 0.826 to 0.990 |
| Last plasma albumin                                         | 28   | (6)    | 0.870 | 0.798 to 0.949 |
| Total urine output in the last 24 hours                     | 2007 | (1293) | 0.781 | 0.703 to 0.867 |
| <b>Procedures and treatments related (5 features)</b>       |      |        |       |                |
| If enteral feeding was used at any point during ICU stay    | -    | -      | 1.119 | 0.946 to 1.323 |
| If a central venous catheter was present at ICU discharge   | -    | -      | 1.118 | 0.957 to 1.306 |
| If an insulin infusion was used in the last 24 hours        | -    | -      | 1.055 | 0.894 to 1.246 |
| If parenteral feeding was used at any point during ICU stay | -    | -      | 1.044 | 0.799 to 1.363 |
| A dysrhythmia at any point during ICU stay                  | -    | -      | 1.001 | 0.999 to 1.003 |

Table SM3-2.

| Vital sign                         | Mean (SD)  |
|------------------------------------|------------|
| Heart rate, beats per min.         | 83 (14)    |
| Respiratory rate, breaths per min. | 17 (2)     |
| Systolic blood pressure, mmHg      | 129 (19)   |
| SpO <sub>2</sub> , %               | 97 (3)     |
| Temperature, C                     | 36.3 (0.5) |
